# Supplementary material for: Generation of an Escherichia coli strain growing on methanol via the ribulose monophosphate cycle
Source: PubMed Central journal article supplement (PMC9448777; doi:10.1038/s41467-022-32744-9), 2022-09-06
Supplement: 41467_2022_32744_MOESM3_ESM.pdf [file 41467_2022_32744_MOESM3_ESM.pdf]

## **Description of Additional Supplementary Files**

File name: Supplementary Data 1

Description: Summary of proteomics data.

File name: Supplementary Data 2

Description: List of gene symbols used in this study.

File name: Supplementary Data 3

Description: Overview of samples used for genome resequencing and associated accession numbers.

File name: Supplementary Data 4

Description: Oligonucleotides and strains used in this study.

File name: Supplementary Data 5

Description: List of reactions added to the *E. coli* core model used for flux balance analysis.

File name: Supplementary Data 6

Description: Considered reactions for evaluating carbon assimilation and dissimilation during methylotrophic growth by flux balance analysis.
