# Supplementary material for: Generation of an Escherichia coli strain growing on methanol via the ribulose monophosphate cycle
Source: PubMed Central journal article supplement (PMC9448777; doi:10.1038/s41467-022-32744-9), 2022-09-06
Supplement: 41467_2022_32744_MOESM10_ESM.pdf [file 41467_2022_32744_MOESM10_ESM.pdf]

## Reporting Summary

Nature Research wishes to improve the reproducibility of the work that we publish. This form provides structure for consistency and transparency in reporting. For further information on Nature Research policies, see our [Editorial Policies](#) and the [Editorial Policy Checklist](#).

### Statistics

For all statistical analyses, confirm that the following items are present in the figure legend, table legend, main text, or Methods section.

n/a Confirmed

- The exact sample size ( $n$ ) for each experimental group/condition, given as a discrete number and unit of measurement
- A statement on whether measurements were taken from distinct samples or whether the same sample was measured repeatedly
- The statistical test(s) used AND whether they are one- or two-sided  
*Only common tests should be described solely by name; describe more complex techniques in the Methods section.*
- A description of all covariates tested
- A description of any assumptions or corrections, such as tests of normality and adjustment for multiple comparisons
- A full description of the statistical parameters including central tendency (e.g. means) or other basic estimates (e.g. regression coefficient) AND variation (e.g. standard deviation) or associated estimates of uncertainty (e.g. confidence intervals)
- For null hypothesis testing, the test statistic (e.g.  $F$ ,  $t$ ,  $r$ ) with confidence intervals, effect sizes, degrees of freedom and  $P$  value noted  
*Give  $P$  values as exact values whenever suitable.*
- For Bayesian analysis, information on the choice of priors and Markov chain Monte Carlo settings
- For hierarchical and complex designs, identification of the appropriate level for tests and full reporting of outcomes
- Estimates of effect sizes (e.g. Cohen's  $d$ , Pearson's  $r$ ), indicating how they were calculated

*Our web collection on [statistics for biologists](#) contains articles on many of the points above.*

### Software and code

Policy information about [availability of computer code](#)

Data collection

Cobra python (v0.20.0, Heirendt, L. et al. Creation and analysis of biochemical constraint-based models using the COBRA Toolbox v.3.0. Nat. Protoc. 14, 639–702 (2019)) was used to predict the fluxes in Escherichia coli DtpiADfrmA growing on pyruvate and methanol as cosubstrates and on methanol alone. The python version was 3.7.1.

Executable scripts alongside used raw data for generating all figures will be accessible from ETH Zurich gitlab ([https://gitlab.ethz.ch/mreiter/methylotrophic\\_ecoli/](https://gitlab.ethz.ch/mreiter/methylotrophic_ecoli/)) upon publication.

Data analysis

EMZed3, unpublished tool based on EMZed2 (Kiefer, P. et al. eMZed: an open source framework in Python for rapid and interactive development of LC/MS data analysis workflows. Bioinformatics 29, 963–964 (2013)), was used for the analysis of the isotopic tracer experiment.

Proteomics data was processed using Progenesis Q1 (Nonlinear Dynamics, v.4.2.7207.22925).

Gene set enrichment analysis of the proteomics data was conducted against the KEGG database using clusterProfiler (v.4.4.1, R-version 0.4.2).

Genome resequencing data was processed using BBDMap (v.38.95) and Breseq (v.0.36.0).

Mutation enrichment analysis was conducted against the KEGG database using clusterProfiler (v.4.4.1, R-version 0.4.2).

Executable scripts alongside used raw data for generating all figures will be accessible from ETH Zurich gitlab ([https://gitlab.ethz.ch/mreiter/methylotrophic\\_ecoli/](https://gitlab.ethz.ch/mreiter/methylotrophic_ecoli/)) upon publication.

For manuscripts utilizing custom algorithms or software that are central to the research but not yet described in published literature, software must be made available to editors and reviewers. We strongly encourage code deposition in a community repository (e.g. GitHub). See the Nature Research [guidelines for submitting code & software](#) for further information.

## Data

Policy information about [availability of data](#)

All manuscripts must include a [data availability statement](#). This statement should provide the following information, where applicable:

- Accession codes, unique identifiers, or web links for publicly available datasets
- A list of figures that have associated raw data
- A description of any restrictions on data availability

Data supporting the findings of this work are available within the paper and its Supplementary Data files. A reporting summary for this Article is available as a Supplementary Data file. The datasets and materials generated and analyzed during the current study are available from the corresponding author upon request. The E. coli core model is accessible from the BIGG FBA model database (<http://bigg.ucsd.edu/>). Genome resequencing raw files are available from the sequence read archive (SRA). Corresponding accession numbers are listed in Supplementary Data 5. The mass spectrometry proteomics data have been deposited to the ProteomeXchange Consortium (<http://proteomecentral.proteomexchange.org>) via the PRIDE partner repository with the dataset identifier PXD034138. Source data are provided with this paper.

## Field-specific reporting

Please select the one below that is the best fit for your research. If you are not sure, read the appropriate sections before making your selection.

- Life sciences       Behavioural & social sciences       Ecological, evolutionary & environmental sciences

For a reference copy of the document with all sections, see [nature.com/documents/nr-reporting-summary-flat.pdf](https://nature.com/documents/nr-reporting-summary-flat.pdf)

## Life sciences study design

All studies must disclose on these points even when the disclosure is negative.

|                 |                                                                                                                                                                                                                                                                                                                                                                                                                                                                                            |
|-----------------|--------------------------------------------------------------------------------------------------------------------------------------------------------------------------------------------------------------------------------------------------------------------------------------------------------------------------------------------------------------------------------------------------------------------------------------------------------------------------------------------|
| Sample size     | Sample sizes were chosen to reflect the state of the art in the field, see for example comparable studies (e.g. <a href="https://doi.org/10.1016/j.cell.2020.07.010">https://doi.org/10.1016/j.cell.2020.07.010</a> ; <a href="https://doi.org/10.1038/s41467-020-19235-5">https://doi.org/10.1038/s41467-020-19235-5</a> ). Besides that no predetermination of the sample sizes was conducted. Where applicable, all experiments were performed in at least three biological replicates. |
| Data exclusions | No data were excluded from the analysis.                                                                                                                                                                                                                                                                                                                                                                                                                                                   |
| Replication     | All experiments were performed in at least three biological replicates and all experiments were successfully replicated.                                                                                                                                                                                                                                                                                                                                                                   |
| Randomization   | For biological replicates, individual clones were picked randomly from agar plates. Additional randomization was not necessary since all experiments included appropriate controls to avoid bias.                                                                                                                                                                                                                                                                                          |
| Blinding        | No blinding was conducted. All experiments included appropriate controls that confirmed assay results.                                                                                                                                                                                                                                                                                                                                                                                     |

## Reporting for specific materials, systems and methods

We require information from authors about some types of materials, experimental systems and methods used in many studies. Here, indicate whether each material, system or method listed is relevant to your study. If you are not sure if a list item applies to your research, read the appropriate section before selecting a response.

### Materials & experimental systems

| n/a                                 | Involved in the study                                  |
|-------------------------------------|--------------------------------------------------------|
| <input checked="" type="checkbox"/> | <input type="checkbox"/> Antibodies                    |
| <input checked="" type="checkbox"/> | <input type="checkbox"/> Eukaryotic cell lines         |
| <input checked="" type="checkbox"/> | <input type="checkbox"/> Palaeontology and archaeology |
| <input checked="" type="checkbox"/> | <input type="checkbox"/> Animals and other organisms   |
| <input checked="" type="checkbox"/> | <input type="checkbox"/> Human research participants   |
| <input checked="" type="checkbox"/> | <input type="checkbox"/> Clinical data                 |
| <input checked="" type="checkbox"/> | <input type="checkbox"/> Dual use research of concern  |

### Methods

| n/a                                 | Involved in the study                           |
|-------------------------------------|-------------------------------------------------|
| <input checked="" type="checkbox"/> | <input type="checkbox"/> ChIP-seq               |
| <input checked="" type="checkbox"/> | <input type="checkbox"/> Flow cytometry         |
| <input checked="" type="checkbox"/> | <input type="checkbox"/> MRI-based neuroimaging |
